# Supplementary material for: Global assessment of climatic responses to ozone–vegetation interactions
Source: Copernicus journal article supplement (doi:10.5194/acp-24-9923-2024), 2024-09-09
Supplement: Supplementary file 1 [file acp-24-9923-2024-supplement.pdf]

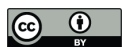

*Supplement of*

## **Global assessment of climatic responses to ozone–vegetation interactions**

**Xinyi Zhou et al.**

*Correspondence to:* Xu Yue (yuexu@nuist.edu.cn)

The copyright of individual parts of the supplement might differ from the article licence.

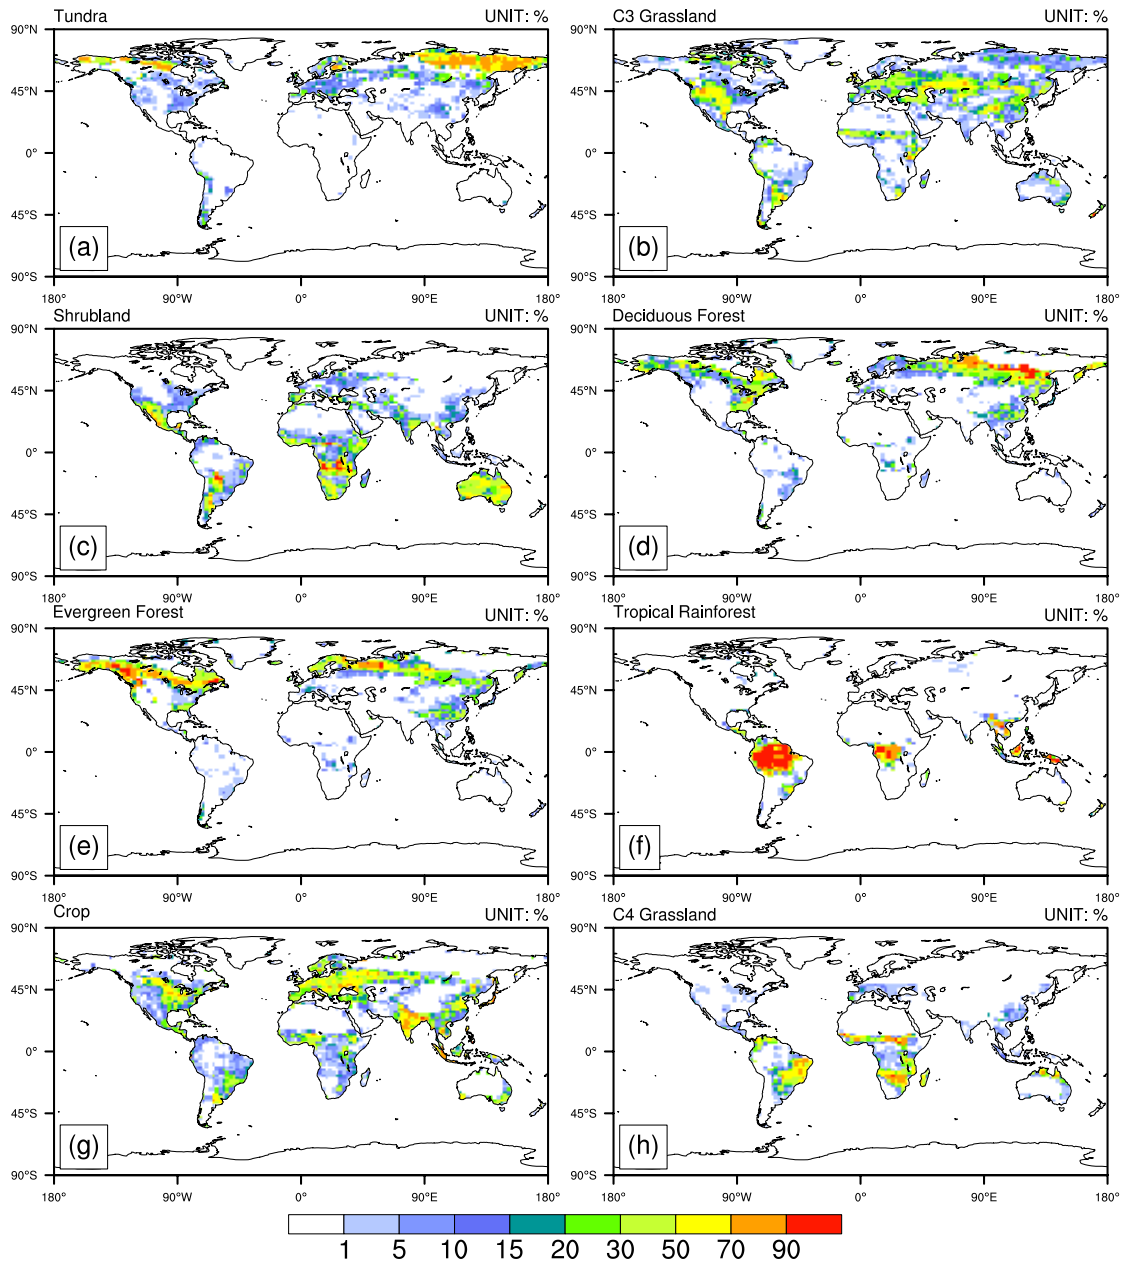

1

2 **Fig. S1.** The cover fraction of 8 plant functional types (PFTs) from the LUH2 used in  
 3 the ModelE2-YIBs model.

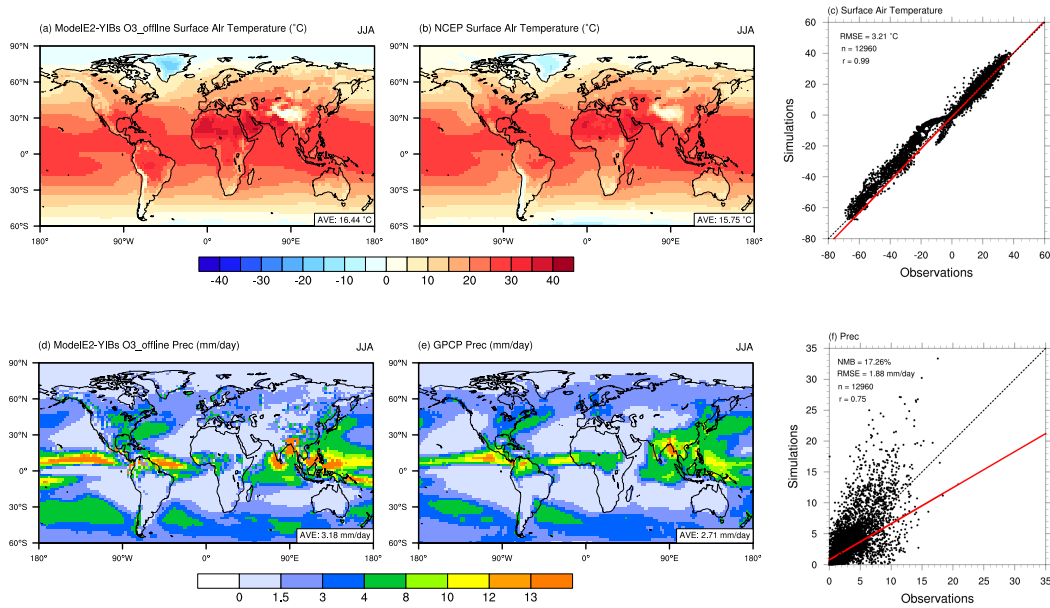

5

6 **Fig. S2.** Evaluation of the present-day boreal summertime (June–August)  
 7 meteorological field simulated by the ModelE2-YIBs model. Surface air temperature  
 8 (a-c) and precipitation (d-f) from the simulation O3\_offline (a & d) and reanalysis data  
 9 (b & e) are compared. The correlation coefficient ( $r$ ), root mean square error (RMSE),  
 10 normalized mean bias (NMB), and number of grid cells ( $n$ ) for the comparisons are  
 11 calculated between the simulations and observations are listed on the scatter panels.

12

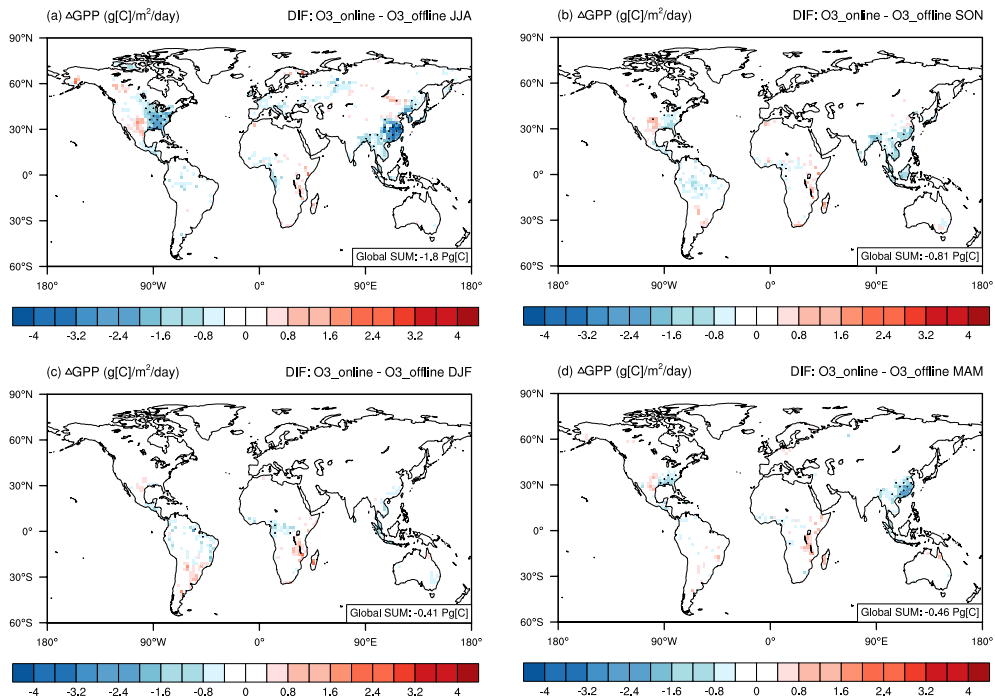

13

14 **Fig. S3.** Changes in present-day GPP in different seasons caused by O<sub>3</sub>-vegetation  
 15 interactions. The results shown are changes in (a) JJA (June-July-August), (b) SON  
 16 (September-October-November), (c) DJF (December-January-February), and (d)  
 17 MAM (March-April-May) between the O<sub>3</sub>\_online and O<sub>3</sub>\_offline simulations. The  
 18 black dots denote areas with significant changes ( $p < 0.1$ ).

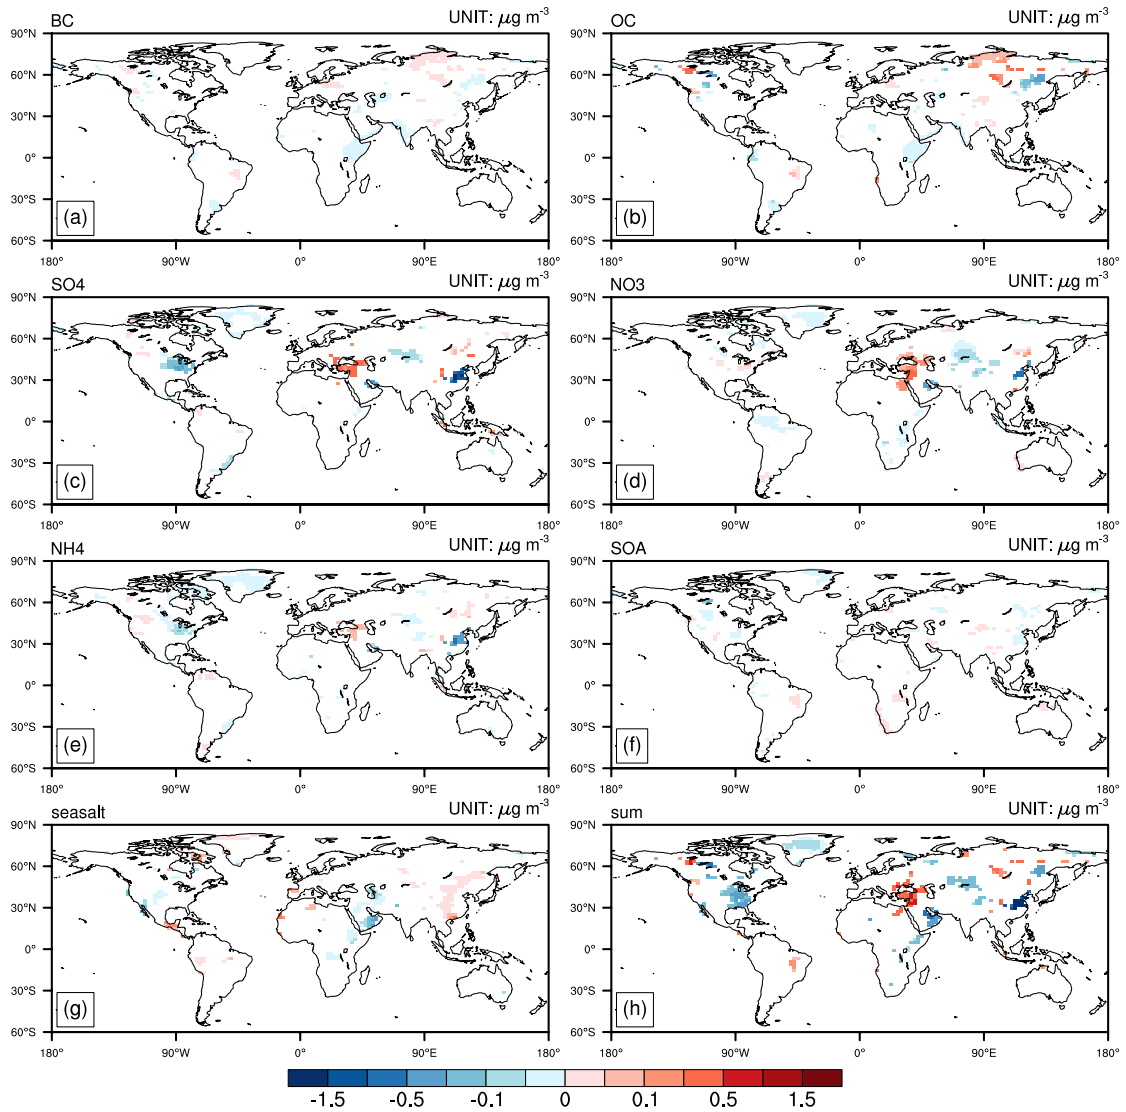

19

20 **Fig. S4.** Changes in present-day summertime 7 types (a-g) PM<sub>2.5</sub> (without silts)  
 21 and their sum (h) caused by O<sub>3</sub>-vegetation interactions. The results shown are changes in  
 22 PM<sub>2.5</sub> between the O3\_online and O3\_offline simulations. Only the significant changes  
 23 ( $p < 0.1$ ) are presented.

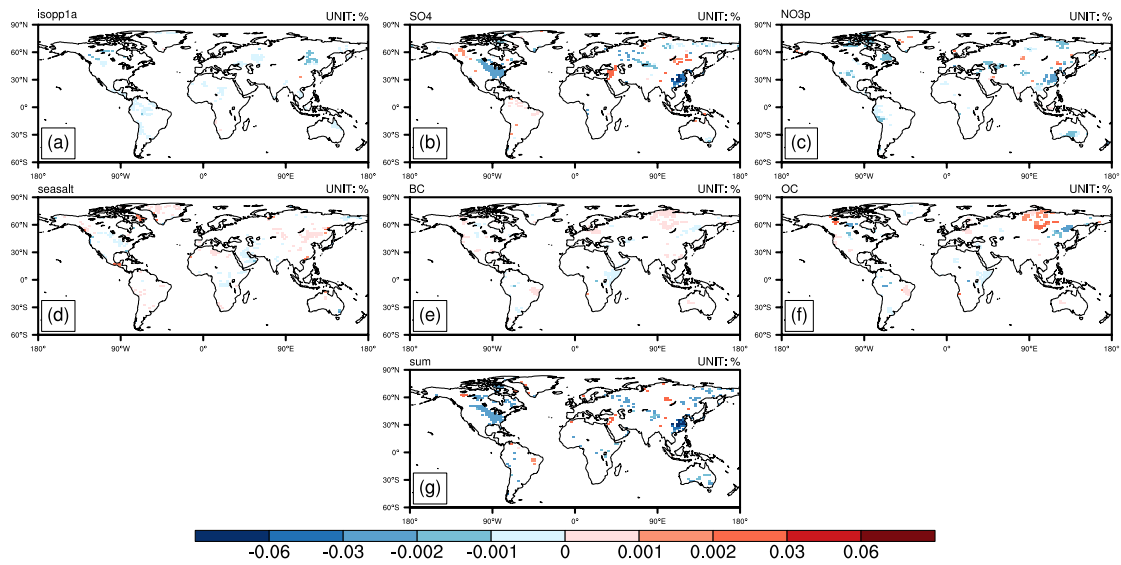

24

25 **Fig. S5.** Changes in present-day summertime 6 types (a-f) AOD and their sum (g)  
 26 caused by O<sub>3</sub>-vegetation interactions. The results shown are changes in AOD between  
 27 the O<sub>3</sub>\_online and O<sub>3</sub>\_offline simulations. Only the significant changes ( $p < 0.1$ ) are  
 28 presented.

29

**Table S1.** Parameters for O<sub>3</sub> damage scheme

| PFT <sup>a</sup>                                          | TDA            | CRAC3          | CRAC4          | SHR            | DBF            | ENF            | TRF            | CRO            |                |
|-----------------------------------------------------------|----------------|----------------|----------------|----------------|----------------|----------------|----------------|----------------|----------------|
| Carboxylation                                             | C <sub>3</sub> | C <sub>3</sub> | C <sub>4</sub> | C <sub>3</sub> | C <sub>4</sub> |
| $F_{O_3,crit}$<br>(nmol m <sup>-2</sup> s <sup>-1</sup> ) | 1.6            | 5              | 5              | 1.6            | 1.6            | 1.6            | 1.6            | 5              | 5              |
| $a_h$ <sup>b</sup><br>(mmol m <sup>-2</sup> )             | 0.1            | 1.4            | 0.735          | 0.1            | 0.15           | 0.075          | 0.15           | 1.4            | 0.735          |

31 <sup>a</sup> Plant function types (PFTs) are tundra (TDA), C<sub>3</sub> grassland (GRAC3), C<sub>4</sub>  
 32 savanna/grassland (GRAC4), shrubland (SHR), deciduous broadleaf forest (DBF),  
 33 evergreen needleleaf forest (ENF), tropical rainforest (TRF), and cropland (CRO).

34 <sup>b</sup> Parameters  $a_h$  is the high O<sub>3</sub>-damaging sensitivities.

35 **Table S2.** Relative changes of terrestrial ecosystems in two major geographic regions  
36 in response to O<sub>3</sub>-vegetation interactions in model

| Region        | GPP          | Stomatal Conductance | LAI         |
|---------------|--------------|----------------------|-------------|
| eastern China | -25.40±1.90% | -30.62±4.30%         | -4.53±1.14% |
| eastern U.S.  | -20.14±5.02% | -25.65±9.32%         | -5.87±3.11% |

37



38 **Table S3.** Changes of climatic variables in two major geographic regions in response  
 39 to O<sub>3</sub>-vegetation interactions in model

| Region        | Surface Air Temperature<br>(unit: °C) | Precipitation<br>(unit: mm day <sup>-1</sup> ) | Sensible Heat Flux<br>(W m <sup>-2</sup> ) |
|---------------|---------------------------------------|------------------------------------------------|--------------------------------------------|
| eastern China | 0.56±0.38°C                           | -0.79±1.05<br>(16.18±20.38%)                   | 7.12±3.86<br>(25.46±14.71%)                |
| eastern U.S.  | 0.33±0.87 °C                          | -0.45±1.33<br>(-9.82±14.20%)                   | 6.3±5.4<br>(16.54±15.59%)                  |

40

41 **Table S4.** Changes of air pollution in two major geographic regions in response to O<sub>3</sub>-  
 42 vegetation interactions in model

| Region        | MDA8 O <sub>3</sub> (ppbv) | PM <sub>2.5</sub> (unit: $\mu\text{g m}^{-3}$ ) | AOD                           |
|---------------|----------------------------|-------------------------------------------------|-------------------------------|
| eastern China | 1.46±3.02                  | -1.94±1.67<br>(-8.52±6.88%)                     | -0.06±0.05<br>(-14.67±16.75%) |
| eastern U.S.  | 1.15±1.77                  | -0.27±0.36<br>(-6.01±7.9%)                      | -0.01±0.01<br>(-8.15±9.38%)   |

43
